# Supplementary material for: Calibur: a tool for clustering large numbers of protein decoys
Source: PubMed Central journal article supplement (PMC2881085; doi:10.1186/1471-2105-11-25), 2010-01-13
Supplement: 1471-2105-11-25-S2.pdf [file 1471-2105-11-25-S2.pdf]

Calibur's CPU time and obtained decoy scores using 16000 decoys

| Target        | TM-score | C <sub>α</sub> RMSD       | CPU Time       |
|---------------|----------|---------------------------|----------------|
| 1abv_         | 0.2868   | 13.050                    | 57.88          |
| 1af7_         | 0.4916   | 4.379                     | 68.39          |
| 1ah9_         | 0.6313   | 3.341                     | 420.82         |
| 1aoy_         | 0.6598   | 4.761                     | 830.93         |
| 1b4bA         | 0.4840   | 5.571                     | 119.30         |
| 1b72A         | 0.6722   | 3.233                     | 81.74          |
| 1bm8_         | 0.3580   | 7.072                     | 827.47         |
| 1bq9A         | 0.3734   | 8.181                     | 253.30         |
| 1cewI         | 0.1840   | 16.137                    | 781.12         |
| 1cqkA         | 0.8523   | 1.687                     | 993.67         |
| 1csp_         | 0.7190   | 2.384                     | 252.52         |
| 1cy5A         | 0.8779   | 1.660                     | 937.30         |
| 1dcjA_        | 0.3701   | 12.182                    | 265.42         |
| 1di2A_        | 0.7683   | 2.620                     | 449.80         |
| 1dtjA_        | 0.8065   | 1.881                     | 893.01         |
| 1egxA         | 0.7740   | 2.598                     | 1198.61        |
| 1fadA         | 0.5800   | 3.620                     | 311.07         |
| 1fo5A         | 0.5432   | 3.871                     | 974.06         |
| 1g1cA         | 0.7794   | 2.648                     | 1312.40        |
| 1gjxA         | 0.4104   | 7.830                     | 86.92          |
| 1gnuA         | 0.5420   | 9.150                     | 377.14         |
| 1gpt_         | 0.5207   | 6.445                     | 374.16         |
| 1gyvA         | 0.7678   | 3.435                     | 297.59         |
| 1hbkA         | 0.6633   | 3.482                     | 566.85         |
| 1itpA         | 0.3076   | 10.809                    | 78.42          |
| 1jnuA         | 0.7506   | 2.681                     | 859.70         |
| 1kjs_         | 0.3608   | 8.511                     | 298.73         |
| 1kviA         | 0.7067   | 2.100                     | 619.23         |
| 1mkyA3        | 0.4095   | 5.579                     | 62.56          |
| 1mla_2        | 0.6349   | 2.824                     | 224.51         |
| 1mn8A         | 0.3480   | 7.452                     | 129.24         |
| 1n0uA4        | 0.4571   | 4.623                     | 216.24         |
| 1ne3A         | 0.4281   | 6.091                     | 145.67         |
| 1no5A         | 0.4251   | 10.695                    | 157.41         |
| 1npsA         | 0.7565   | 2.280                     | 595.34         |
| 1o2fB_        | 0.3585   | 9.004                     | 69.83          |
| 1of9A         | 0.5422   | 3.635                     | 817.08         |
| 1ogwA_        | 0.6844   | 2.717                     | 745.96         |
| 1orgA         | 0.7666   | 2.583                     | 1056.22        |
| 1pgx_         | 0.5295   | 3.260                     | 354.70         |
| 1r69_         | 0.7538   | 1.971                     | 483.21         |
| 1sfp_         | 0.7455   | 5.261                     | 1300.52        |
| 1shfA         | 0.8183   | 1.494                     | 250.25         |
| 1sro_         | 0.6483   | 3.542                     | 768.01         |
| 1ten_         | 0.8202   | 1.799                     | 977.52         |
| 1tfi_         | 0.4991   | 5.136                     | 574.84         |
| 1thx_         | 0.7966   | 2.262                     | 1044.96        |
| 1tif_         | 0.3180   | 7.783                     | 76.79          |
| 1tig_         | 0.5609   | 3.580                     | 96.74          |
| 1vcc_         | 0.3717   | 8.159                     | 351.04         |
| 256bA         | 0.7600   | 3.448                     | 1229.45        |
| 2a0b_         | 0.8034   | 2.467                     | 992.32         |
| 2cr7A         | 0.3699   | 8.239                     | 68.50          |
| 2f3nA         | 0.7188   | 1.960                     | 613.22         |
| 2pcy_         | 0.6402   | 4.658                     | 791.07         |
| 2reb_2        | 0.3372   | 5.928                     | 76.41          |
| Avg. TM-score | 0.581143 | Total C <sub>α</sub> RMSD | Total CPU time |
|               |          | 283.749                   | 28857.2        |

Calibur's CPU time and obtained decoy scores using 19000 decoys

| Target        | TM-score | C <sub>α</sub> RMSD       | CPU Time       |
|---------------|----------|---------------------------|----------------|
| 1abv_         | 0.2868   | 13.050                    | 60.96          |
| 1af7_         | 0.4767   | 4.452                     | 71.04          |
| 1ah9_         | 0.6450   | 3.314                     | 531.55         |
| 1aoy_         | 0.6598   | 4.761                     | 1166.59        |
| 1b4bA         | 0.4728   | 5.751                     | 123.13         |
| 1b72A         | 0.6722   | 3.233                     | 84.60          |
| 1bm8_         | 0.3580   | 7.072                     | 1186.99        |
| 1bq9A         | 0.3734   | 8.181                     | 340.64         |
| 1cewI         | 0.1840   | 16.137                    | 1100.84        |
| 1cqkA         | 0.8523   | 1.687                     | 1362.21        |
| 1csp_         | 0.7190   | 2.384                     | 249.38         |
| 1cy5A         | 0.8779   | 1.660                     | 1296.45        |
| 1dcjA_        | 0.3701   | 12.182                    | 375.08         |
| 1di2A_        | 0.7668   | 2.618                     | 614.03         |
| 1dtjA_        | 0.7960   | 2.115                     | 1206.60        |
| 1egxA         | 0.7740   | 2.598                     | 1564.89        |
| 1fadA         | 0.5800   | 3.620                     | 310.15         |
| 1fo5A         | 0.5432   | 3.871                     | 1330.68        |
| 1g1cA         | 0.7794   | 2.648                     | 1834.58        |
| 1gjxA         | 0.4104   | 7.830                     | 87.10          |
| 1gnuA         | 0.5420   | 9.150                     | 539.13         |
| 1gpt_         | 0.5113   | 6.292                     | 507.13         |
| 1gyvA         | 0.7641   | 3.408                     | 297.17         |
| 1hbkA         | 0.6633   | 3.482                     | 786.94         |
| 1itpA         | 0.3076   | 10.809                    | 80.02          |
| 1jnuA         | 0.7506   | 2.681                     | 1201.97        |
| 1kjs_         | 0.3830   | 8.436                     | 435.27         |
| 1kviA         | 0.7067   | 2.100                     | 873.41         |
| 1mla_2        | 0.6349   | 2.824                     | 63.96          |
| 1mkyA3        | 0.4037   | 5.531                     | 226.02         |
| 1mn8A         | 0.3566   | 7.447                     | 137.44         |
| 1n0uA4        | 0.4571   | 4.623                     | 222.04         |
| 1ne3A         | 0.5214   | 4.073                     | 192.91         |
| 1no5A         | 0.4251   | 10.695                    | 153.13         |
| 1npsA         | 0.7565   | 2.280                     | 809.54         |
| 1o2fB_        | 0.3585   | 9.004                     | 69.68          |
| 1of9A         | 0.5422   | 3.635                     | 1122.39        |
| 1ogwA_        | 0.6844   | 2.717                     | 1042.38        |
| 1orgA         | 0.7566   | 2.659                     | 1497.53        |
| 1pgx_         | 0.5043   | 3.506                     | 457.16         |
| 1r69_         | 0.7538   | 1.971                     | 682.84         |
| 1sfp_         | 0.7455   | 5.261                     | 1823.54        |
| 1shfA         | 0.8183   | 1.494                     | 350.81         |
| 1sro_         | 0.6483   | 3.542                     | 1066.59        |
| 1ten_         | 0.8233   | 1.837                     | 1368.14        |
| 1tfi_         | 0.4889   | 4.746                     | 809.26         |
| 1thx_         | 0.7966   | 2.262                     | 1463.04        |
| 1tif_         | 0.3339   | 7.574                     | 78.61          |
| 1tig_         | 0.5609   | 3.580                     | 98.25          |
| 1vcc_         | 0.3760   | 8.128                     | 452.45         |
| 2a0b_         | 0.8034   | 2.467                     | 1646.85        |
| 2cr7A         | 0.3699   | 8.239                     | 1381.10        |
| 2f3nA         | 0.7263   | 1.938                     | 71.61          |
| 2pcy_         | 0.6402   | 4.658                     | 842.35         |
| 2reb_2        | 0.3372   | 5.928                     | 1101.90        |
| 256bA         | 0.7600   | 3.448                     | 78.86          |
| Avg. TM-score | 0.582325 | Total C <sub>α</sub> RMSD | Total CPU time |
|               |          | 281.589                   | 38928.9        |

Calibur's CPU time and obtained decoy scores using 22000 decoys

| Target | TM-score      | C <sub>α</sub> RMSD       | CPU Time       |
|--------|---------------|---------------------------|----------------|
| 1abv_  | 0.2868        | 13.050                    | 69.64          |
| 1af7_  | 0.4767        | 4.452                     | 76.30          |
| 1ah9_  | 0.6337        | 3.017                     | 820.47         |
| 1aoy_  | 0.6649        | 4.724                     | 1622.57        |
| 1b4bA  | 0.4840        | 5.571                     | 120.92         |
| 1b72A  | 0.6764        | 3.102                     | 101.11         |
| 1bm8_  | 0.3580        | 7.072                     | 1435.58        |
| 1bq9A  | 0.3734        | 8.181                     | 478.05         |
| 1cewI  | 0.1840        | 16.137                    | 1263.05        |
| 1cqkA  | 0.8523        | 1.687                     | 1541.70        |
| 1csp_  | 0.7190        | 2.384                     | 269.94         |
| 1cy5A  | 0.8701        | 1.620                     | 1718.17        |
| 1dcjA_ | 0.3701        | 12.182                    | 462.90         |
| 1di2A_ | 0.7668        | 2.618                     | 685.75         |
| 1dtjA_ | 0.7960        | 2.115                     | 1352.50        |
| 1egxA  | 0.7740        | 2.598                     | 1713.56        |
| 1fadA  | 0.5800        | 3.620                     | 317.96         |
| 1fo5A  | 0.5432        | 3.871                     | 1597.84        |
| 1g1cA  | 0.7794        | 2.648                     | 2014.83        |
| 1gjxA  | 0.3926        | 8.226                     | 100.87         |
| 1gnuA  | 0.5420        | 9.150                     | 589.29         |
| 1gpt_  | 0.5113        | 6.292                     | 775.22         |
| 1gyvA  | 0.7678        | 3.435                     | 296.45         |
| 1hbkA  | 0.6633        | 3.482                     | 880.96         |
| 1itpA  | 0.3076        | 10.809                    | 81.66          |
| 1jnuA  | 0.7506        | 2.681                     | 1311.19        |
| 1kjs_  | 0.3608        | 8.511                     | 488.67         |
| 1kviA  | 0.7067        | 2.100                     | 959.85         |
| 1mla_2 | 0.6349        | 2.824                     | 66.79          |
| 1mkyA3 | 0.4037        | 5.531                     | 221.07         |
| 1mn8A  | 0.3532        | 7.009                     | 142.87         |
| 1n0uA4 | 0.4571        | 4.623                     | 228.53         |
| 1ne3A  | 0.4315        | 5.915                     | 181.57         |
| 1no5A  | 0.4251        | 10.695                    | 160.85         |
| 1npsA  | 0.7565        | 2.280                     | 939.44         |
| 1o2fB_ | 0.3955        | 5.569                     | 77.81          |
| 1of9A  | 0.5422        | 3.635                     | 1254.91        |
| 1ogwA_ | 0.6827        | 2.739                     | 1182.19        |
| 1orgA  | 0.7566        | 2.659                     | 1653.70        |
| 1pgx_  | 0.5295        | 3.260                     | 537.23         |
| 1r69_  | 0.7538        | 1.971                     | 772.03         |
| 1sfp_  | 0.7455        | 5.261                     | 2074.76        |
| 1shfA  | 0.8183        | 1.494                     | 460.69         |
| 1sro_  | 0.6483        | 3.542                     | 1188.50        |
| 1ten_  | 0.8233        | 1.837                     | 1498.52        |
| 1tfi_  | 0.4991        | 5.136                     | 1186.52        |
| 1thx_  | 0.8014        | 2.288                     | 1987.43        |
| 1tif_  | 0.3339        | 7.574                     | 74.74          |
| 1tig_  | 0.5609        | 3.580                     | 95.09          |
| 1vcc_  | 0.3717        | 8.159                     | 560.82         |
| 2a0b_  | 0.7745        | 2.782                     | 2030.56        |
| 2cr7A  | 0.3699        | 8.239                     | 1840.51        |
| 2f3nA  | 0.7263        | 1.938                     | 71.25          |
| 2pcy_  | 0.6402        | 4.658                     | 936.07         |
| 2reb_2 | 0.3487        | 5.906                     | 1263.50        |
| 256bA  | 0.7600        | 3.448                     | 81.01          |
|        | Avg. TM-score | Total C <sub>α</sub> RMSD | Total CPU time |
|        | 0.580996      | 279.887                   | 45916          |

Calibur's CPU time and obtained decoy scores using 25000 decoys

| Target        | TM-score | C <sub>α</sub> RMSD       | CPU Time       |
|---------------|----------|---------------------------|----------------|
| 1abv_         | 0.2897   | 13.075                    | 63.60          |
| 1af7_         | 0.4767   | 4.452                     | 74.01          |
| 1ah9_         | 0.6450   | 3.314                     | 982.94         |
| 1aoy_         | 0.6598   | 4.761                     | 1949.62        |
| 1b4bA         | 0.4840   | 5.571                     | 123.14         |
| 1b72A         | 0.6722   | 3.233                     | 85.51          |
| 1bm8_         | 0.3580   | 7.072                     | 1384.84        |
| 1bq9A         | 0.3734   | 8.181                     | 440.22         |
| 1cewI         | 0.1840   | 16.137                    | 1208.81        |
| 1cqkA         | 0.8523   | 1.687                     | 1534.90        |
| 1csp_         | 0.7190   | 2.384                     | 251.45         |
| 1cy5A         | 0.8701   | 1.620                     | 2209.12        |
| 1dcjA_        | 0.3701   | 12.182                    | 477.26         |
| 1di2A_        | 0.7668   | 2.618                     | 685.01         |
| 1dtjA_        | 0.7960   | 2.115                     | 1341.46        |
| 1egxA         | 0.7740   | 2.598                     | 1722.85        |
| 1fadA         | 0.5772   | 3.664                     | 312.90         |
| 1fo5A         | 0.5432   | 3.871                     | 1468.92        |
| 1g1cA         | 0.7794   | 2.648                     | 2015.77        |
| 1gjxA         | 0.4104   | 7.830                     | 88.18          |
| 1gnuA         | 0.5420   | 9.150                     | 521.99         |
| 1gpt_         | 0.5113   | 6.292                     | 848.16         |
| 1gyvA         | 0.7678   | 3.435                     | 294.76         |
| 1hbkA         | 0.6633   | 3.482                     | 852.60         |
| 1itpA         | 0.3076   | 10.809                    | 80.19          |
| 1jnuA         | 0.7506   | 2.681                     | 1312.75        |
| 1kjs_         | 0.3830   | 8.436                     | 490.65         |
| 1kviA         | 0.7067   | 2.100                     | 955.61         |
| 1mla_2        | 0.6349   | 2.824                     | 63.46          |
| 1mkyA3        | 0.4095   | 5.579                     | 227.24         |
| 1mn8A         | 0.3532   | 7.009                     | 133.95         |
| 1n0uA4        | 0.4571   | 4.623                     | 216.03         |
| 1ne3A         | 0.4281   | 6.091                     | 147.88         |
| 1no5A         | 0.4251   | 10.695                    | 158.41         |
| 1npsA         | 0.7565   | 2.280                     | 887.64         |
| 1o2fB_        | 0.3585   | 9.004                     | 69.11          |
| 1of9A         | 0.5422   | 3.635                     | 1236.51        |
| 1ogwA_        | 0.6827   | 2.739                     | 1163.07        |
| 1orgA         | 0.7566   | 2.659                     | 1636.94        |
| 1pgx_         | 0.5295   | 3.260                     | 522.97         |
| 1r69_         | 0.7538   | 1.971                     | 747.93         |
| 1sfp_         | 0.7455   | 5.261                     | 1999.28        |
| 1shfA         | 0.8183   | 1.494                     | 417.48         |
| 1sro_         | 0.6483   | 3.542                     | 1192.94        |
| 1ten_         | 0.8233   | 1.837                     | 1497.61        |
| 1tfi_         | 0.4983   | 5.077                     | 1312.53        |
| 1thx_         | 0.8014   | 2.288                     | 2455.55        |
| 1tif_         | 0.3339   | 7.574                     | 80.03          |
| 1tig_         | 0.5609   | 3.580                     | 98.42          |
| 1vcc_         | 0.3760   | 8.128                     | 528.77         |
| 2a0b_         | 0.8034   | 2.467                     | 1811.03        |
| 2cr7A         | 0.3699   | 8.239                     | 2334.31        |
| 2f3nA         | 0.7263   | 1.938                     | 71.23          |
| 2pcy_         | 0.6425   | 4.981                     | 952.97         |
| 2reb_2        | 0.3372   | 5.928                     | 1261.33        |
| 256bA         | 0.7600   | 3.448                     | 81.27          |
| Avg. TM-score | 0.581545 | Total C <sub>α</sub> RMSD | Total CPU time |
|               |          | 283.549                   | 47083.1        |

Calibur's CPU time and obtained decoy scores using 28000 decoys

| Target        | TM-score | C <sub>α</sub> RMSD       | CPU Time       |
|---------------|----------|---------------------------|----------------|
| 1abv_         | 0.2868   | 13.050                    | 63.49          |
| 1af7_         | 0.4767   | 4.452                     | 75.60          |
| 1ah9_         | 0.6450   | 3.314                     | 1109.40        |
| 1aoy_         | 0.6598   | 4.761                     | 2419.53        |
| 1b4bA         | 0.4840   | 5.571                     | 118.25         |
| 1b72A         | 0.6722   | 3.233                     | 84.22          |
| 1bm8_         | 0.3580   | 7.072                     | 1392.79        |
| 1bq9A         | 0.3734   | 8.181                     | 451.99         |
| 1cewI         | 0.1840   | 16.137                    | 1219.16        |
| 1cqkA         | 0.8523   | 1.687                     | 1544.21        |
| 1csp_         | 0.7190   | 2.384                     | 276.55         |
| 1cy5A         | 0.8701   | 1.620                     | 2781.78        |
| 1dcjA_        | 0.3701   | 12.182                    | 477.20         |
| 1di2A_        | 0.7668   | 2.618                     | 673.79         |
| 1dtjA_        | 0.7960   | 2.115                     | 1331.68        |
| 1egxA         | 0.7740   | 2.598                     | 1752.23        |
| 1fadA         | 0.5800   | 3.620                     | 321.82         |
| 1fo5A         | 0.5432   | 3.871                     | 1486.41        |
| 1g1cA         | 0.7794   | 2.648                     | 2015.71        |
| 1gjxA         | 0.4104   | 7.830                     | 83.11          |
| 1gnuA         | 0.5420   | 9.150                     | 570.49         |
| 1gpt_         | 0.5113   | 6.292                     | 1072.82        |
| 1gyvA         | 0.7641   | 3.408                     | 305.42         |
| 1hbkA         | 0.6633   | 3.482                     | 871.85         |
| 1itpA         | 0.3076   | 10.809                    | 77.54          |
| 1jnuA         | 0.7506   | 2.681                     | 1321.04        |
| 1kjs_         | 0.3830   | 8.436                     | 499.68         |
| 1kviA         | 0.7067   | 2.100                     | 960.55         |
| 1mla_2        | 0.6349   | 2.824                     | 62.77          |
| 1mkyA3        | 0.4139   | 5.175                     | 218.55         |
| 1mn8A         | 0.3480   | 7.452                     | 133.19         |
| 1n0uA4        | 0.4571   | 4.623                     | 214.87         |
| 1ne3A         | 0.5214   | 4.073                     | 205.65         |
| 1no5A         | 0.4251   | 10.695                    | 154.94         |
| 1npsA         | 0.7565   | 2.280                     | 968.67         |
| 1o2fB_        | 0.3943   | 5.524                     | 80.29          |
| 1of9A         | 0.5422   | 3.635                     | 1238.20        |
| 1ogwA_        | 0.6844   | 2.717                     | 1138.62        |
| 1orgA         | 0.7566   | 2.659                     | 1649.84        |
| 1pgx_         | 0.5043   | 3.506                     | 548.35         |
| 1r69_         | 0.7538   | 1.971                     | 749.55         |
| 1sfp_         | 0.7455   | 5.261                     | 2006.09        |
| 1shfA         | 0.8183   | 1.494                     | 419.59         |
| 1sro_         | 0.6483   | 3.542                     | 1186.91        |
| 1ten_         | 0.8233   | 1.837                     | 1531.45        |
| 1tfi_         | 0.4991   | 5.136                     | 1757.60        |
| 1thx_         | 0.7966   | 2.262                     | 3200.67        |
| 1tif_         | 0.3339   | 7.574                     | 79.26          |
| 1tig_         | 0.5609   | 3.580                     | 97.13          |
| 1vcc_         | 0.3760   | 8.128                     | 530.03         |
| 2a0b_         | 0.7745   | 2.782                     | 1840.83        |
| 2cr7A         | 0.3699   | 8.239                     | 2982.38        |
| 2f3nA         | 0.7263   | 1.938                     | 66.47          |
| 2pcy_         | 0.6402   | 4.658                     | 930.52         |
| 2reb_2        | 0.3372   | 5.928                     | 1241.74        |
| 256bA         | 0.7600   | 3.448                     | 76.95          |
| Avg. TM-score | 0.58272  | Total C <sub>α</sub> RMSD | Total CPU time |
|               |          | 278.243                   | 50669.4        |

| Calibur's CPU time and obtained decoy scores using 31000 decoys |          |                           |          |
|-----------------------------------------------------------------|----------|---------------------------|----------|
| Target                                                          | TM-score | C <sub>α</sub> RMSD       | CPU Time |
| 1abv_                                                           | 0.2868   | 13.050                    | 61.00    |
| 1af7_                                                           | 0.4767   | 4.452                     | 68.56    |
| 1ah9_                                                           | 0.6450   | 3.314                     | 1134.76  |
| 1aoy_                                                           | 0.6649   | 4.724                     | 2924.48  |
| 1b4bA                                                           | 0.4728   | 5.751                     | 118.88   |
| 1b72A                                                           | 0.6764   | 3.102                     | 80.77    |
| 1bm8_                                                           | 0.3627   | 6.842                     | 1363.30  |
| 1bq9A                                                           | 0.3734   | 8.181                     | 491.85   |
| 1cewI                                                           | 0.1840   | 16.137                    | 1191.57  |
| 1cqkA                                                           | 0.8523   | 1.687                     | 1530.71  |
| 1csp_                                                           | 0.7190   | 2.384                     | 277.44   |
| 1cy5A                                                           | 0.8701   | 1.620                     | 3343.29  |
| 1dcjA_                                                          | 0.3701   | 12.182                    | 485.11   |
| 1di2A_                                                          | 0.7668   | 2.618                     | 744.34   |
| 1dtjA_                                                          | 0.7960   | 2.115                     | 1399.34  |
| 1egxA                                                           | 0.7740   | 2.598                     | 1732.00  |
| 1fadA                                                           | 0.5800   | 3.620                     | 319.80   |
| 1fo5A                                                           | 0.5432   | 3.871                     | 1516.35  |
| 1g1cA                                                           | 0.7794   | 2.648                     | 2128.74  |
| 1gjxA                                                           | 0.4104   | 7.830                     | 85.20    |
| 1gnuA                                                           | 0.5420   | 9.150                     | 564.41   |
| 1gpt_                                                           | 0.5113   | 6.292                     | 1357.01  |
| 1gyvA                                                           | 0.7678   | 3.435                     | 294.76   |
| 1hbkA                                                           | 0.6633   | 3.482                     | 883.23   |
| 1itpA                                                           | 0.3207   | 10.924                    | 83.01    |
| 1jnuA                                                           | 0.7506   | 2.681                     | 1308.58  |
| 1kjs_                                                           | 0.3830   | 8.436                     | 501.81   |
| 1kviA                                                           | 0.7067   | 2.100                     | 970.08   |
| 1mla_2                                                          | 0.6349   | 2.824                     | 63.10    |
| 1mkyA3                                                          | 0.4095   | 5.579                     | 219.33   |
| 1mn8A                                                           | 0.3480   | 7.452                     | 133.68   |
| 1n0uA4                                                          | 0.4571   | 4.623                     | 231.90   |
| 1ne3A                                                           | 0.5214   | 4.073                     | 197.52   |
| 1no5A                                                           | 0.4251   | 10.695                    | 153.55   |
| 1npsA                                                           | 0.7565   | 2.280                     | 894.72   |
| 1o2fB_                                                          | 0.3585   | 9.004                     | 65.26    |
| 1of9A                                                           | 0.5422   | 3.635                     | 1289.87  |
| 1ogwA_                                                          | 0.6844   | 2.717                     | 1205.06  |
| 1orgA                                                           | 0.7566   | 2.659                     | 1636.53  |
| 1pgx_                                                           | 0.5043   | 3.506                     | 525.92   |
| 1r69_                                                           | 0.7538   | 1.971                     | 752.21   |
| 1sfp_                                                           | 0.7455   | 5.261                     | 2031.52  |
| 1shfA                                                           | 0.8183   | 1.494                     | 410.80   |
| 1sro_                                                           | 0.6483   | 3.542                     | 1165.09  |
| 1ten_                                                           | 0.8233   | 1.837                     | 1507.16  |
| 1tfi_                                                           | 0.4983   | 5.077                     | 1950.76  |
| 1thx_                                                           | 0.7966   | 2.262                     | 3726.24  |
| 1tif_                                                           | 0.3084   | 7.871                     | 76.55    |
| 1tig_                                                           | 0.5609   | 3.580                     | 95.28    |
| 1vcc_                                                           | 0.3717   | 8.159                     | 573.85   |
| 2a0b_                                                           | 0.7745   | 2.782                     | 1812.09  |
| 2cr7A                                                           | 0.3699   | 8.239                     | 3600.48  |
| 2f3nA                                                           | 0.7263   | 1.938                     | 68.14    |
| 2pcy_                                                           | 0.6402   | 4.658                     | 931.66   |
| 2reb_2                                                          | 0.3372   | 5.928                     | 1225.95  |
| 256bA                                                           | 0.7600   | 3.448                     | 77.62    |
| Avg. TM-score                                                   | 0.581805 | Total C <sub>α</sub> RMSD | 282.32   |
|                                                                 |          | Total CPU time            | 53582.2  |
